# 1 High rates of apoptosis visualized in the symbiont-bearing gills

## 2 of deep-sea *Bathymodiolus* mussels

3Piquet Bérénice<sup>1,2</sup>, Shillito Bruce<sup>2</sup>, Lallier François H.<sup>1</sup>, Duperron Sébastien<sup>2,3,4</sup>, Andersen Ann C.<sup>1</sup>

4

51: Sorbonne Université, CNRS, UMR7144, Lab. Adaptation et Diversité en Milieu Marin, AD2M, Team : Adaptation et

6Biologie des Invertébrés marins en Conditions Extrêmes, ABICE, Station Biologique de Roscoff, SBR, 29680 Roscoff,

7France.

82: Sorbonne Université, MNHN, CNRS, IRD, UCN, UA, UMR7208, Lab. Biologie des Organismes et Ecosystèmes

9Aquatiques BOREA, Team : Adaptation aux Milieux Extrêmes, AMEX, 7 Quai Saint-Bernard, 75005 Paris, France.

103: Muséum National d'Histoire Naturelle, CNRS, UMR7245, Lab. Mécanismes de Communication et Adaptation des

11Micro-organismes, Team : Cyanobactéries, Cyanotoxines et Environnement, CCE, 12 rue Buffon, 75005 Paris, France.

124: Institut Universitaire de France, Paris, France.

13

14Corresponding authors: [andersen@sb-roscoff.fr](mailto:andersen@sb-roscoff.fr) and [sebastien.duperron@mnhn.fr](mailto:sebastien.duperron@mnhn.fr)

## 15 Abstract

16 Symbiosis between *Bathymodiolus* and Gammaproteobacteria enables these deep-sea mussels to live in toxic  
17 environments like hydrothermal vents and cold seeps. The quantity of endosymbionts within the gill-  
18 bacteriocytes appears to vary according to the hosts environment. We investigated the hypothesis of a control  
19 of the endosymbionts density by apoptosis, a programmed cell death. We used fluorometric TUNEL-method  
20 and active Caspase-3-targeting antibodies to visualize and quantify apoptotic cells in mussel gills. To avoid  
21 artefacts due to depressurization upon specimen recovery from the deep-sea, we compared the apoptotic rates  
22 between mussels recovered unpressurised, versus mussels recovered in a pressure-maintaining device, in two  
23 species from hydrothermal vents on the Mid-Atlantic Ridge: *Bathymodiolus azoricus* and *B. puteoserpentis*.  
24 Our results show that pressurized recovery had no significant effect on the apoptotic rate in the gill filaments.  
25 Apoptotic levels were highest in the ciliated zone and in the circulating hemocytes, compared to the  
26 bacteriocyte zone. Apoptotic gill-cells in *B. aff. boomerang* from the pockmarks off the Gulf of Guinea,  
27 show similar distribution patterns. Deep-sea symbiotic mussels have much higher rates of apoptosis in their  
28 gills than the coastal mussel *Mytilus edulis* without chemolithoautotrophic symbionts. We discuss how  
29 apoptosis might be one of the mechanisms that contribute to the adaptation of deep-sea mussels to toxic  
30 environments and/or to symbiosis.

31

32 Key words: symbiosis, isobaric recovery, hydrothermal vents, cold seeps, *Mytilus edulis*, bacteriocytes.

## 33 Introduction

34 Symbiosis is of major significance to life on Earth. Because symbiosis is a mixture of cooperation and  
35 conflict between two (or several) partners, each of them must initiate and carry on a continued dialogue, and  
36 control their partners' interaction. Many symbioses involve partners from different domains of life, such as a  
37 eukaryote host and a bacterial symbiont. This questions how a reciprocal control can occur between so  
38 distantly related organisms, and whether some of the mechanisms involved might be universal. One of the  
39 mechanisms by which an animal host can control populations of its symbionts is apoptosis. Apoptosis is a  
40 programmed cell death involving three main steps: (1) nuclear condensation and fragmentation, (2) cell-wall  
41 budding into apoptotic bodies, and (3) their release and possible phagocytosis by neighboring cells [1,2].  
42 Apoptosis plays multiple roles in normal cell turnover, during development, and in the immune system [3].  
43 Its role in symbiosis is also documented: in the cereal weevil *Sitophilus* for example, apoptosis participates to  
44 regulate the densities of the endosymbiotic bacterium *Sodalis pierantonius*. The symbiont provides essential  
45 amino acids that allow the host to rapidly build its protective exoskeleton. Endosymbionts multiply in young  
46 adults, but when the cuticle is built, the symbionts are rapidly eliminated through apoptosis of the host cells  
47 that contain them [4]. In corals, bleaching occurs in response to heat stress, when the host releases  
48 dinoflagellate symbionts through apoptosis and autophagy linked in a see-saw manner, such that when  
49 apoptosis is inhibited autophagy is initiated as a back-up mechanism, and vice-versa [5]. In addition  
50 apoptosis might act as a post-phagocytic winnowing mechanism in the symbiotic system [6].

51 At deep-sea hydrothermal vents and cold seeps, the animals that dominate in terms of biomass live in  
52 association with chemosynthetic bacteria, which sustain most of their nutrition [7–10], but the role apoptosis  
53 could play in regulating symbiosis has barely been explored. In the vestimentiferan tubeworms *Riftia*  
54 *pachyptila*, living at vents, and *Lamellibrachia luymesii* from cold seeps, the sulfur-oxidizing symbionts are

55located within cells of the trophosome. These cells differentiate and proliferate from the trophosome lobule  
56center, then migrate towards the periphery of the lobule where they undergo apoptosis [11]. Ultrastructural  
57observations at the periphery of the trophosome lobules show that the symbionts are digested in vacuoles  
58leading to extensive myelin bodies, then remnants of symbionts disappear, while apoptotic nuclei with  
59clumped chromatin patches occur [11]. Thus, in *Riftia* as in the weevil, apoptosis appears to be involved in  
60the process of symbiont regulation to recover the metabolic investment from the symbiotic phase.

61       Deep-sea mussels house very dense populations of endosymbionts inside specialized gill epithelial  
62cells, the bacteriocytes, [12,13]. In fact, *Bathymodiolus* constitute by far the densest microbial habitats,  
63although they usually host a very limited diversity of symbiont lineages [7,8]. The relevance to the topic of  
64symbiont control lies in the fact that the association is particularly flexible, with abundances of their  
65symbionts (Sulfur- and/or methane-oxidizers) that can vary within hours depending on the availability of  
66symbiont substrates in the surrounding water [8,14–18]. The symbionts also rapidly disappear if their  
67substrates are absent [17–19]. Ultrastructural studies of the gill cells have indicated intracellular digestion of  
68the symbionts within lysosomes as an important carbon transfer mechanism [20–22] suggesting that the host  
69can access the energy stored in its symbionts by killing and digesting them (i.e. a process compared to  
70“farming”). Enzymatic studies involving the detection of acid phosphatases have shown that some energy  
71from the symbionts can also be transferred to the host through molecules leaking from live symbionts (i.e. a  
72process compared to “milking”) [23]. Recent results from whole-gill tissue transcriptomic analyses in the  
73vent species *Bathymodiolus thermophilus* indicated that high symbiont loads are correlated with under-  
74expression of the genes inhibiting apoptosis, suggesting that when the symbionts are abundant, apoptosis  
75might be activated [24,25]. It can thus be hypothesized that apoptosis is a mechanism by which the hosts  
76control the number of symbionts inside their gills, and possibly obtain their carbon. High throughput

77sequencing and transcriptomic analyses have shown the great importance of the apoptotic signaling pathways  
78in the gill tissue of several species of *Bathymodiolus* [26–28].

79 Apoptosis in mollusks is generally triggered by the interaction between immune cells and parasites  
80or pathogens [29]. The high degree of evolutionary conservation of biochemical signaling and executing  
81pathways of apoptosis indicate that programmed cell death likely plays a crucial role in homeostasis and  
82functioning of molluscan immune system [29–31]. Apoptosis is particularly complex in mollusks, and  
83caspases are key molecules that are activated in two major apoptotic pathways: the extrinsic or death  
84receptor pathway, and the intrinsic or mitochondrial pathway [31]. The executioner caspase-3 activates a  
85heterodimer protein, the DNA fragmentation factor that is responsible for the completion of DNA  
86fragmentation [31]. However alternative caspase-independent pathways have also been evidenced in  
87mollusks, and cross-talk between different pathways might also be involved [30,31]. Apoptosis was shown to  
88be induced in *Bathymodiolus azoricus* in response to *Vibrio diabolicus* exposure [32]. However the immune  
89gene responses in *B. azoricus* appeared tied to the presence of endosymbiont bacteria, as the progressive  
90weakening of its host transcriptional activity correlates with the gradual disappearance of endosymbiont  
91bacteria from the gill tissues during the extended acclimatization in the sulfide and methane-free aquaria  
92[32]. Thus, the presence of symbionts might modulate the apoptotic patterns in deep-sea symbiotic mussels  
93compared to their coastal mussel relatives without chemolithoautotrophic symbiont.

94 While several studies have highlighted an important activity of apoptotic signaling factors in three  
95species of *Bathymodiolus* (*B. azoricus*, *B. manusensis* from hydrothermal vents, and *B. platifrons* from cold  
96seeps (Bettencourt et al., 2010; Wong et al., 2015; Zheng et al., 2017)), transcriptomic studies do not give a  
97visual account of this apoptotic activity within the tissues. The present study is the first microscopic  
98investigation of the general distribution patterns of apoptotic cells in the gills, and the first attempt to

99quantify apoptosis in the different gill cell types of *Bathymodiolus*. We chose to focus on three species,  
100namely *Bathymodiolus azoricus*, *B. puteoserpentis* and *B. aff. boomerang*. The first two often dominate the  
101macrofauna at Mid-Atlantic Ridge (MAR) hydrothermal vent sites [33,34]. The third occurs at cold seeps  
102located on the continental margin in the Gulf of Guinea [35]. The former two species are phylogenetically  
103sister species and are also closely related to *B. boomerang* [12]. All three species harbor methane- and sulfur-  
104oxidizing bacteria that co-exist within host cells. Their gills comprise several cell types: epidermal ciliated  
105cells and mucous goblet cells, bacteriocytes hosting the symbionts, interspaced by intercalary cells, and  
106finally circulating hemocytes [36]. Our aim was to investigate, whether apoptosis might contribute to  
107regulating symbiont densities. We thus tested, whether apoptosis preferentially occurs in bacteriocytes, in  
108particular the most densely populated ones.

109       As the recovery of deep-sea specimens from several thousand meters depth usually involves a  
110depressurization stress that might alter gene expression and disturb the cell machinery, leading to artefacts  
111[37,38] we performed a comparative analysis of apoptosis in specimens recovered with and without  
112depressurization upon collection. Specimens of *B. azoricus* and *B. puteoserpentis* were recovered using an  
113hyperbaric chamber (PERISCOP - Projet d'Enceinte de Remontée Isobare Servant la Capture d'Organismes  
114Profonds) that allows maintaining their native pressure and temperature throughout recovery, avoiding  
115recovery bias [39]. Control specimens recovered without PERISCOP were included. The cold seep *B. aff.*  
116*boomerang* was analyzed to identify potential seep versus vent habitat-related differences, and *Mytilus edulis*  
117was used as a non-chemolithoautotrophic-symbiont-bearing control mussel. Apoptosis was visualized in gill  
118tissue sections by the TUNEL method (Transferase dUTP Nick-End Labeling) [11,40,41], a common and  
119standard way of visualizing the fragmented DNA in the nucleus of cells undergoing apoptosis. To further  
120support that observed patterns actually correspond to apoptosis, we performed immunolocalization of active

121Caspase-3, a form of this enzyme that is the overall convergent node of molecular cascades leading to  
122irreversible apoptosis in mollusks [31]. Altogether, this study provides to our knowledge the first visual  
123overview of apoptosis in relation to symbiosis in chemosynthetic mussels.

124

## 125Materials and Methods

### 126*Specimen collection*

127 This analysis was conducted on 40 individuals of *Bathymodiolus* (Bivalvia, Mytilidae) consisting in  
12821 *Bathymodiolus azoricus* and ten *B. puteoserpentis* from hydrothermal vents, and nine *B. aff. boomerang*  
129from cold seeps. Specimens of *B. azoricus* were collected during the BioBaz 2013 cruise on the Mid-Atlantic  
130Ridge [42]: ten specimens were sampled from the vent fields of Menez Gwen (MG2 marker: 37°50.669N;  
13131°31.156W, 830m depth) and eleven specimens from Rainbow site (France 5 marker: 37°17.349N;  
13232°16.536W, at 2270 m depth). *B. puteoserpentis* were sampled during the BICOSE 2014 cruise [43]. All  
133ten specimens were sampled on the vent site Snake Pit, close to the “Elan” marker (23°22'54"N, 44°55'48'  
134°W, at 3520 m depth). For these two species, half of the specimens were recovered in a standard (i.e.  
135unpressurized) way, and the other half using the PERISCOP hyperbaric vessel. The standard collection was  
136done in a waterproof sealed box (BIOBOX) containing local deep-sea water, in which the mussels were  
137exposed to a depressurization corresponding to the depth of their habitat during recovery (approx. 0.1 MPa  
138every 10 m). The pressurized recovery was performed using a small device named the "Croco" sampling cell  
139[44], which was transferred into the PERISCOP pressure-maintaining device [39]. PERISCOP was released  
140from the seafloor through a shuttle system, and surfaced within 45 to 100 minutes. Pressure was monitored

141 during ascent with an autonomous pressure sensor (SP2T4000, NKE Instruments, France). To compare  
142 apoptosis between vent and seep mussels, nine specimens of *Bathymodiolus* aff. *boomerang* were collected  
143 in a standard manner from the Régab pockmark site in the Gulf of Guinea (M1 marker 5°47.89S, 9°42.62E,  
144 3150 m depth and M2 marker 5°47.85S, 9°42.67E, 3150 m depth) during the 2011 cruise WACS [45]. All  
145 three cruises were aboard the RV *Pourquoi Pas?* using the ROV *Victor 6000*. In addition to deep-sea  
146 mussels, nine coastal mussels (*Mytilus edulis*) in two sets were analyzed. First set were wild *M. edulis*  
147 collected on rocks from the intertidal seashore in front of Roscoff Marine Station in January 2014 (n=4  
148 individuals analyzed). The second set of *M. edulis* were cultivated mussels bought from the fishmongers in  
149 Paris in January 2017 (n= 5 individuals analyzed). All data concerning the specimens are shown in the  
150 Supplementary Table 1.

### 151 *Sample fixation, inclusion and FISH experiments*

152 Mussel gills were dissected at 4°C, within 10 minutes after recovery (releasing pressure of the  
153 PERISCOP in the case of isobaric recoveries). Maximum shell length, height under the umbo, and width of  
154 the closed shell were measured with a caliper (see supplementary figure 1). Anterior and posterior gill  
155 fragments were fixed in 4% formaldehyde in sterile-filtered seawater (SFS) for 2 hours. Gills were then  
156 rinsed in SFS, and dehydrated in increasing series of ethanol (50, 70 and 80%, 15 min each). In the  
157 laboratory, gills were embedded in polyethylene glycol (PEG) distearate: 1-hexadecanol (9:1), cut into 8 µm-  
158 thick sections using a microtome (Thermo, Germany), recovered on SuperFrost Plus slides (VWR  
159 International, USA), and stored at -20°C. Fluorescence *in situ* hybridization (FISH) experiments were  
160 performed to confirm the localization of symbionts following the protocol and using probes described  
161 previously [15]. The gill lamellae were sectioned ventrally, so that each filament appeared in cross-section



162with its frontal end facing externally towards mantle and shell, and its abfrontal end facing the inner gill  
163lamellae towards the foot. (See supplementary figure 2).

### 164 *TUNEL (Transferase dUTP Nick-End Labeling)*

165 For the detection and quantification of apoptosis, we used the TUNEL method with the *in-situ* cell  
166death detection kit following manufacturer's instructions (ROCHE, Germany). All slides were first dewaxed  
167then rehydrated by immersion in decreasing series of ethanol. Tissues were rinsed with PBS 1 X and  
168permeabilized by proteinase K (20 $\mu$ g.ml<sup>-1</sup>) to enable the binding of dUTP. Various incubation times were  
169tested, and 8 min gave the best result. Slides were incubated at 37°C for 1h30 with fluorophore dUTP and  
170enzyme rTdT. Slides were rinsed in 3 PBS bathes (10 min each) to remove the unfixed fluorescein-12-dUTP.  
171In a last step, DNA of all nuclei was labelled with 4'6'-Diamidino-2-phenylindole (DAPI) that is  
172incorporated in the SlowFade® Gold Antifade Mounting reagent (Invitrogen, USA). For each analyzed  
173individual, positive and negative controls were performed on adjacent serial sections. The positive control  
174involved a pre-incubation with DNase I (3U/ml, 10 min) before running the full protocol. It provokes  
175artificial fragmentation of DNA and exposes 3'OH ends, which bind the green fluorochrome and leads to all  
176nuclei being labelled. The negative control follows the same protocol, but omitting the rTdT enzyme. It  
177enables to reveal autofluorescence of the tissues and unspecific fixation of the fluorophore.

### 178 *Immunolocalization of active Caspase-3*

179 Slides were dewaxed and rehydrated as for the TUNEL experiments. They were then covered in  
180blocking solution (PBS 10X, 2% BSA, 0.3% triton) for 2 h at 4°C. Tissue sections were incubated with the  
181rabbit polyclonal active anti-Caspase-3 primary antibody (directed against a peptide from the P17 fragment  
182of the activated human/mouse Caspase-3) (R&D system, USA). This primary incubation lasted 2 hours at

1834°C. Slides were rinsed in PBS 10X three times and covered with the secondary antibody: Alexa Fluor 488-  
184labelled goat anti-rabbit (Invitrogen, dilution 1:500) for 1 h at room temperature. After 3 baths in PBS 10X,  
185slides were mounted with SlowFade®. Negative controls were obtained by omitting the primary antibody.

### 186 *Image acquisition and analysis*

187 Slides were observed under a BX61 epifluorescence microscope (Olympus, Japan), and pictures  
188 were taken under an SP5 confocal (Leica, Germany) at the x40 magnification. This magnification enabled a  
189 clear resolution to count each individual labeled nucleus. Entire cross-sections of the TUNEL-labelled gill  
190 filaments were covered in full in about 3 to 4 pictures (figures 1 and 2). The exposure time (or gain on the  
191 confocal) was standardized and identical for all pictures. The 3D-acquisitions were obtained by acquiring  
192 images every 0.5 µm throughout the thickness of the section. Slides were observed at 505 nm and 555 nm  
193 wavelengths (TUNEL and Caspase 3 signals, respectively), and 400 nm (DAPI). Classical immuno-  
194 localization are shown with all labeling in their original color (DAPI in blue), but for TUNEL labelled nuclei  
195 we had to change the DAPI color into red. Indeed blue DNA-labelling overlaid by green (i.e. apoptosis  
196 TUNEL labeling) leads to a complex mixture of various levels of green and blue, often making quantitative  
197 interpretations difficult. To enable an easy quantitative analysis of the TUNEL images, we chose to visualize  
198 DAPI in red, so that a double labelling would lead to a third distinct color (yellowish). Thus, a TUNEL-  
199 labelled nucleus appears bright green when its amount of fragmented DNA is great (i.e. when a nucleus is in  
200 an advanced state of apoptosis), but yellow or orange, when its amount of fragmented DNA is respectively  
201 low or very low (i.e. when a nucleus is in an early state of apoptosis). At first, we counted green and  
202 yellowish nuclei separately, but as they both expressed apoptosis, and early and advanced states were  
203 randomly distributed in the gill lamellae (figures 1 and 2), we finally pooled them together.

204**Figure 1: FISH and TUNEL labelling on gill filaments of *B. azoricus*.** A: Transverse section of gill filaments with FISH labelling.  
205Nuclei from host tissue in blue (DAPI); sulfur-oxidizing symbionts in pink, and methane-oxidizers in green. B, C and D TUNEL-  
206labelled nuclei in green, DAPI staining in red. Arrows point to apoptotic nuclei. B: Ciliated zones often contain many labelled nuclei.  
207C: Bacteriocyte zone that displays many apoptotic nuclei (arrows), apoptotic hemocytes (arrowheads) and an apoptotic cell detached  
208from the basal lamina (circle). D: Abfrontal zone of the gill filament showing apoptotic nuclei in cells with no symbiont (arrows),  
209and apoptotic cells detached from the basal lamina (circles). Abbreviations: BZ: Bacteriocyte zone; FCZ: Frontal Ciliated Zone; H:  
210Hemolymph zone; IFCJ Inter-Filamentary Ciliated Junction. Scale bars: 50µm.  
211

212**Figure 2: TUNEL labelling on gill filaments of *B. puteoserpentis*.** TUNEL-labelled nuclei in green, DAPI staining in red. A:  
213Frontal ciliated zones often contain many labelled nuclei. B: Bacteriocyte zone that displays only a few apoptotic nuclei. C: Inter  
214Filamentary ciliated Junction often contain many labelled nuclei. D: Abfrontal zone of the gill filament with apoptotic nuclei.  
215Abbreviations: BZ: Bacteriocyte zone; FCZ: Frontal Ciliated Zone; H: Hemolymph zone; IFCJ Inter-Filamentary Ciliated Junction.  
216Scale bars: 50µm.  
217

218 Images were analyzed by counting the labelled nuclei using the free Image J software [46]. However  
219care was taken to count separately each respective cell-type: hemocytes, ciliated cells and finally  
220bacteriocytes and intercalary cells (the two latter being close neighboring cell types, hard to distinguish  
221under the fluorescence microscope, they were counted together) (figure 1 and 2). Thus for each image,  
222percentages of TUNEL-labelled nuclei were obtained from the hemolymph zone (HZ), the ciliated zone  
223(CZ), and the bacteriocyte zone (BZ) by calculating the ratio between the number of TUNEL-labelled nuclei  
224and the number of DAPI-labeled nuclei present in each respective zone. A fourth value, the total percentage  
225for the whole picture, was obtained by summing all labeled nuclei (whatever their cell-type) on the total  
226number of DAPI-stained nuclei in a given picture.

### 227*Comparisons between species, zones and treatments*

228 The percentage of TUNEL nuclei labelled was used for all analyses after an Arcsine transformation  
229[47]. The normality of datasets was tested (Shapiro-Wilk test), which revealed a non-normal distribution of  
230the data. Non-parametric tests were thus applied for inter-groups comparisons (Mann–Whitney–Wilcoxon  
231and Kruskal–Wallis) with the Bonferroni correction for multiple comparisons. All statistical analyses and  
232graph plots were performed using R (R Development Core Team, version 3.3.3).

233

## 234 Results

235 All analyses were performed on transverse sections of the gill lamellae (supplementary figure 2).  
236 From the FISH results, it is noteworthy that bacteriocytes close to the frontal ciliated zone contained large  
237 quantities of endosymbionts, and that both the height of the bacteriocytes and their symbiont density  
238 decreased towards the abfrontal zone in *B. puteoserpentis*, and *B. azoricus* (figure 1A). This frontal/abfrontal  
239 decrease in symbiont density also appears with the DAPI staining, as this labels not only the host nuclei, but  
240 also the DNA of the bacterial symbionts.

### 241 *Visualization of apoptosis in Bathymodiolus*

242 The distribution of TUNEL positive cells in *B. azoricus* and *B. puteoserpentis* are shown in Fig. 1  
243 and 2, respectively. In negative controls (supplementary figure 3B), no fluorescence at all was observed  
244 compared to positive controls (supplementary figure 3A), except a bright auto-fluorescence signal seen in  
245 clustered round granules. These granules are thought to correspond to mucus droplets present in goblet-cells  
246 interspersed among the ciliated cells and along the epithelium of the gill filaments. This autofluorescence  
247 signal was easy to distinguish from TUNEL signal, as the latter was typically much smaller and brighter.  
248 Nuclei labelled in the TUNEL experiments were more or less bright. As TUNEL labels the free 3'OH  
249 fragments, we assume that the strongly labelled nuclei showed a higher amount of DNA fragments compared  
250 to the weakly stained ones. Since apoptosis is a progressive process occurring within a few hours, we  
251 hypothesize that the former were in a more advanced apoptotic state. Both weak (orange or even yellow) and

252strong-labelled nuclei (green) were thus counted together to estimate the percentage of apoptotic nuclei in the  
253various cell-types of the gill lamellae (ciliated zone, bacteriocyte zone and hemolymph) (figure 1 and 2).

254**Figure 3: Active Caspase-3 labelling in the gill of *B. azoricus*.** Typical labelling in green surrounds the nucleus (arrows). DAPI  
255signal in blue. Scale bar: 50µm.

256  
257 The ciliated frontal zone often is the brightest labelled zone with many strongly labelled cells: up to  
258one cell out of two in some filaments (Fig. 1B, 2A) giving a clustered appearance of the apoptotic cells in the  
259frontal ciliated zone. However the closest neighbor filament may sometimes only have a few or no labelled  
260cells at all, indicating a great spatial variability in the tissue taken all together. Hemocytes were present on all  
261images, but in varying numbers. Many hemocytes are visible on figure 1C for example, compared to figure  
2621B, but more of them were labelled in the latter. TUNEL-labelling in the bacteriocyte zone was  
263heterogeneous: very few nuclei were labelled close to the frontal ciliated zone (figure 1B and figure 2A), and  
264then increasingly more were labelled when reaching the abfrontal zone (figure 1D and figure 2D). In the  
265abfrontal zone, the bacteriocytes were most of the time devoid of bacteria. Sometimes, a bacteriocyte seemed  
266to be lacking in the abfrontal zone, leaving a “hole” in the epithelial tissue (figure 1C-D and figure 2 B-D).

267 Active Caspase 3 immunohistochemistry assays yielded strong signals within the cytoplasm of cells,  
268and particularly concentrated around the nuclei (figure 3). On serial sections within the same individual, the  
269distribution patterns of active Caspase-3 were similar to the TUNEL signal observed, confirming that  
270TUNEL actually revealed apoptotic cells. In general, the active Caspase-3 antibody seemed to label more  
271nuclei than TUNEL.

## 272*Patterns of apoptosis in Bathymodiolus azoricus and B. puteoserpentis*

273 In total, 31 individuals from the two species were analyzed, representing a total of 19,612 DAPI-  
274labelled nuclei counted on 206 images. The specimens came from deep-sea sites located at different depths,

275namely Menez Gwen (-830 m), Rainbow (-2270 m) and Snake Pit (-3520 m). Sampled specimens were  
276either recovered unpressurised (non-isobaric) or with a pressurized (isobaric) recovery. In the latter,  
277PERISCOP reached the surface while retaining 83.6, 76.5 and 70.4% of the native deep-sea pressure at the  
278Menez Gwen, Rainbow and Snake Pit sites, respectively.

279 First of all, comparing the global counts in gills of all individuals from all three sites, we noted that  
280there is a great variation in the percentage of apoptotic nuclei among individuals (see supplementary figure 4  
281A-C). This strong heterogeneity indicates that results of statistical analyses must be treated with caution. In  
282the ciliated (CZ) and bacteriocyte zones (BZ), the percentage of TUNEL-labelled nuclei was not  
283significantly different among the three MAR sites and the two recovery types (CZ: Kruskal-Wallis test chi-  
284squared =6.07, df=5, p-value=0.30; BZ: Kruskal-Wallis test chi-squared=3.69, df=5, p-value=0.60) (See  
285figure 4 for BZ and supplementary figure 5 A for CZ). Similarly, the hemolymph zone showed no significant  
286difference among sites and recovery types (HZ: Kruskal-Wallis test chi-squared=10.74, df=5, p-  
287value=0.05678) (supplementary figure 5 B). These quantitative results confirm the visual patterns and  
288intensities of TUNEL-labelling in gill filaments of mussels that did not reveal any self-evident difference  
289between specimens from the three sites in either recovery type. For all specimens put together,  
290quantifications indicated median values of 41.3% ( $\pm 27\%$ ) and 34.5% ( $\pm 31\%$ ) labelled nuclei in the ciliated  
291and hemolymph zones, respectively. In comparison, the bacteriocyte zone displayed only 19.3% ( $\pm 24\%$ ) of  
292nuclei that were labelled, (figure 5) which is significantly less than in the other two (Kruskal-Wallis test chi-  
293squared=27.639, df=2, p-value<0.001, post-hoc test with Bonferroni correction between HZ and BZ, p-  
294value=0.0002; between CZ and BZ, p-value <0.0001).

295**Figure 4: Percentages of apoptotic nuclei in the bacteriocyte zone of *B. azoricus* (Ba) and *B. puteoserpentis* (Bp) from the**  
296**three sites.** White boxplots indicate specimens from non-isobaric, and grey from isobaric recoveries, respectively. Percentages were  
297not significantly different (a) in pairwise Wilcoxon test with Bonferroni's standard correction. The letter *n* indicates the number of  
298individuals analyzed for each species. Boxplot whiskers correspond to minimal and maximal values on a single image, the line inside  
299the box is the median, and the upper and lower frames of the boxes represent the first and third quartile respectively.  
300

301 **Figure 5: Percentages of apoptotic nuclei in the hemolymph, ciliated and bacteriocyte zones of *B. azoricus* and *B.***  
302 ***puteoserpentis*.** Different letters (a,b) indicate the plots that are statistically different (Wilcoxon test) and n indicates the number of  
303 specimens. Boxplot whiskers indicate minimal and maximal values on a single image, the line inside the box is the median, and the  
304 upper and lower frames of the boxes represent the first and third quartile respectively.

305

### 306 *Patterns of apoptosis in the seep species Bathymodiolus aff. boomerang*

307 TUNEL labelling was applied to the gill filaments of *Bathymodiolus aff. boomerang* 9 specimens, 40  
308 pictures representing 3,424 nuclei) (figure 6 A). Percentages were significantly different between zones  
309 (Kruskal-wallis test: chi-squared=25.00, df=2, p-value<0.0001). As in the two studied vent species, apoptosis  
310 was more frequent in the ciliated zone (median: 36%,  $\pm 23\%$ ) and then in the hemocytes zone (median: 21%  
311  $\pm 9\%$ ), compared to the bacteriocyte zone (median: 9%  $\pm 23\%$ ). Overall these results suggest similar patterns  
312 in Mytilidae from hydrothermal vents and cold seeps (figure 7). Visually, the density of bacteria inside  
313 bacteriocytes seems to be more constant between bacteriocytes located in the frontal and in the abfrontal  
314 distal edge in *B. aff. boomerang* compared to the two vent mussels.

315 **Figure 6: TUNEL labelling on gill filaments of *Bathymodiolus aff. boomerang* (A) and *Mytilus edulis* (B-C).** TUNEL-labelling  
316 in green or yellow, DAPI staining in red. A: *Bathymodiolus aff. boomerang* displays many labelled nuclei mostly in the frontal  
317 ciliated zone. B-C: *Mytilus edulis* gills show very few TUNEL-labelled nuclei, two are visible in the insert (C). Same abbreviations  
318 as in figure 1. Scale bar: 50 $\mu$ m.

319

320 **Figure 7: Percentages of apoptotic nuclei compared between vent and seep species in the ciliated, hemolymph and**  
321 **bacteriocyte zones of *B. azoricus*, *B. puteoserpentis* and *B. aff. boomerang* (Ba, Bp and Bb, respectively).** The letter n indicates  
322 the number of specimens. Boxplot whiskers indicate minimal and maximal values on a single image, line inside the box is the  
323 median, the line inside the box is the median, and the upper and lower frames of the boxes represent the first and third quartile  
324 respectively.

325

### 326 *Patterns of apoptosis in the gill of coastal Mytilus edulis*

327 Gill tissues of *Mytilus edulis* were labelled by the TUNEL method (9 specimens from two different  
328 localizations, 28 images, 4,091 nuclei). Both the wild mussels, collected on the intertidal rocks near the  
329 marine station in January and the commercial mussels bought in Paris in January, gave the same distribution

330 pattern of apoptotic cells. The number of labelled nuclei was very low in comparison to vent and seep  
331 mussels (figure 6B) (median: 1.6%,  $\pm 1.6\%$ ) and nearly the same percentage between pictures. In *M. edulis*,  
332 the majority of labelled nuclei were hemocytes (median: 6.9%,  $\pm 10.9\%$ ) compared to the epidermal cells  
333 (median: 0.9%,  $\pm 1.4\%$ ).

334

## 335 Discussion

### 336 *Relevance of TUNEL labelling to the study of apoptosis in deep-sea mussels*

337 During apoptosis DNA undergoes fragmentation, and the TUNEL assay labels the free 3'OH ends  
338 that are generated. However, other mechanisms can lead to DNA fragmentation that would result in a  
339 positive TUNEL labelling, and for this reason the TUNEL methodology has been criticized [48–50]. It is  
340 nevertheless a standard procedure that has already been applied in mollusk tissues, and in association with  
341 active caspase-3 immunolocalization to detect apoptosis in the chemosymbiotic bivalve *Codakia orbiculata*  
342 [40,51]. Caspase-3 exists within the cytosol as inactive dimers. All apoptotic pathways in mollusks converge  
343 towards a step of cleavage of this zymogen that ultimately results in the triggering of apoptosis [31,52].  
344 Although it may have other roles, the activation of Caspase-3 usually leads to cell death by apoptosis.  
345 Because other caspases activate necrosis and necroptosis pathways, the occurrence of active Caspase-3  
346 signals rather supports that most observed TUNEL signals actually correspond to apoptotic nuclei [53]. It  
347 should however be kept in mind that another apoptotic pathway exists that is Caspase-independent, as it can  
348 take place without activating Caspase-3 [54,55].

### 349 *Deep-sea mussels display high rates of apoptosis in their gills*



350 Recovery stress has long been cited as a factor that may prevent accurate assessment of the  
351 physiology of deep-sea organisms [39,56,57]. In this study, we found no statistical difference between  
352 percentages of apoptotic cells between gills from specimens of *Bathymodiolus azoricus* and *B.*  
353 *puteoserpentis* recovered classically (non-isobaric) and those recovered using the isobaric sampling cell  
354 PERISCOP. Thus depressurization during recovery does not seem to trigger massive apoptosis in the gills,  
355 despite that depressurization, by disrupting cells, may alter the distribution of different actors of apoptosis  
356 that pass through different cell compartments (mitochondria, nucleus, cell membrane) [39]. No differences  
357 were observed between hydrothermal vent sites, whatever their depth, further suggesting that apoptosis is a  
358 natural phenomenon in the gills of deep-sea mussels. Estimates of rates of apoptosis based on TUNEL  
359 labelling were much higher in the gills of deep-sea mussels including the seep species *B. aff. boomerang*,  
360 compared to their coastal relative *Mytilus edulis* lacking chemolithotrophic symbionts. This comparison has  
361 been made with two different sets of *Mytilus*: wild and cultivated, yielding the same scarce TUNEL-  
362 distribution pattern. At this stage it is not possible to ascertain, whether the much higher levels measured in  
363 *Bathymodiolus* are linked with their deep-sea chemosynthetic habitats (for example due to the abundance of  
364 xenobiotic compounds and oxidative stressors), with the occurrence of symbionts, or with their different  
365 evolutionary history.

### 366 *Patterns and potential roles of apoptosis in deep-sea mussels*

367 A major finding in this study is that rates of apoptosis vary considerably among *Bathymodiolus*  
368 individual specimens, contrary to *Mytilus*, for a similar investigation effort. This could reveal distinct  
369 physiological status among the *Bathymodiolus* at the time of the analysis. Nonetheless, it should be  
370 underlined that apoptosis is known to be a rapidly occurring mechanism, in a time range of only a few hours  
371 [1]. The distribution of apoptotic cells in a tissue often shows a clustered pattern, as for instance in the

372mammalian intestine, where apoptotic signal appears typically confined to a cluster of neighboring villi,  
373while other areas of the mucosa appear unstained [41]. A sporadic distribution might ensure a local recycling  
374of the organ, without harming its global function, and might indeed be a characteristic of the apoptotic  
375phenomenon. In the case of *Bathymodiolus*, gills often showed a few TUNEL-positive cells in some cross-  
376sections, and even clusters in the frontal ciliated area of some filaments, but none in the frontal zone of  
377neighboring filaments. This clustered pattern may also contribute to the observed heterogeneity among our  
378individuals. Anyway, the great inter-individual variation prevents from drawing any definitive conclusion,  
379even based on statistical tests of which the results have to be treated with caution. Nevertheless, a clear trend  
380is that the rates measured in the bacteriocyte zone are lower than in the ciliated and hemocyte zones. The  
381very high rates of apoptosis in the ciliated gill cells, in particular compared to *M. edulis*, are intriguing  
382because these cells do not contain chemolithotrophic symbionts. The gills of *Bathymodiolus* are clearly  
383different from those of the coastal mussels for which, at any given size, the gill surface area is around 20  
384times smaller [8]. *Bathymodiolus* gills are particularly thick and over-developed, which might lead to a  
385higher metabolic demand in order to properly circulate water and vital compounds. Ciliated cells also display  
386very abundant mitochondria [8,13,58]. One hypothesis could thus be that the great metabolic activity and  
387numerous mitochondria produce large amounts of Reactive Oxygen Species (ROS), resulting in oxidative  
388stress that may lead to increased apoptosis [59]. A possible adaptation would be to increase the turnover rates  
389of the ciliated cells. To achieve this, high rates of cell proliferation could be expected, and this has to be  
390tested. Another hypothesis is linked with fluid toxicity and the direction of water flow in the gills. Ciliated  
391cells are indeed the first exposed to the surrounding fluid, and thus exposed to the highest levels of reduced  
392compounds including toxic sulfur and various metals that possibly trigger apoptosis [60]. This may also  
393explain why symbionts tend to be more abundant in the bacteriocytes that are close to the regions that are  
394more exposed to their substrates (mainly methane and sulfide), since these compounds might be more easily

395 accessible to symbionts first in the frontal zone compared to the abfrontal zone, sustaining bacterial growth.  
396 Among deleterious compounds, copper ions were for example recently hypothesized to cause cell apoptosis  
397 in *Bathymodiolus azoricus*. Cadmium was shown to cause apoptosis on isolated *Crassostrea gigas*  
398 hemocytes after 24h *in vitro* incubation in the range of 10-100  $\mu\text{mol.L}^{-1}$  [61]. Gills of mussels are known to  
399 accumulate metals, and *Bathymodiolus azoricus* exposed to cadmium display antioxidant enzymatic  
400 activities that may be partly due to the endosymbionts. These could contribute to protect bacteriocytes, but  
401 not the symbiont-free ciliated cells, resulting in higher apoptosis rates in the latter [62]. *In vivo* incubation  
402 experiments at *in situ* pressure would be necessary to test these oxidative stress and fluid toxicity hypotheses.

403 Apoptosis of circulating and resident hemocytes have a high baseline level in mollusks [29], and we  
404 estimated that 34.5 % of the hemocytes were apoptotic in *B. azoricus* and *B. puteoserpentis*. The immune  
405 system of mussels relies on innate immunity only, and hemocytes play a key role in the immune response.  
406 They are also suspected to have a role in detoxification [58]. In *Crassostrea virginica*, the most common  
407 apoptotic cell type is the hemocyte. The apoptotic index for *Crassostrea* hemocytes, calculated the same way  
408 as herein, but using another visualization method (Apoptag), ranges between 23 and 99% with a mean of  
409 46% [63]. In another study, *Crassostrea virginica* displayed between 4.5% and 15.3% of apoptotic  
410 circulating hemocytes (Annexin-V assay) [64]. These results are congruent with the rates observed in this  
411 study, and could reveal overall high apoptosis rates in the hemocytes of bivalves, visually confirming the  
412 importance of apoptosis in the innate immune system.

413 Despite the fact that apoptosis rates are high in *Bathymodiolus* bacteriocytes compared to those in  
414 *M. edulis* epithelial gill-cells, they are only roughly half of those measured in ciliated cells and hemocytes.  
415 Results from transcriptomic studies and their subsequent interpretation by other authors led to the hypothesis  
416 that apoptosis was the main mechanism that allowed mussels (initially *Bathymodiolus thermophilus*) to

417control the amount of symbionts in their gills. The underlying idea was that bacteria-filled bacteriocytes  
418would undergo apoptosis in a way similar to that observed in the tubeworm *Riftia pachyptila*, in which this  
419mechanism participates to the recovery of symbionts carbon, and recycling of the animal cells [11]. On the  
420contrary, our observations show that the bacteriocytes that contain only a few, or no bacteria at all, are  
421mainly those that enter into apoptosis. Lower levels of apoptosis in bacteriocytes, in particular in those where  
422symbionts are the most abundant, could be explained by the bacterial protection concerning the toxic  
423compounds, which could provoke apoptosis of the cell. This could explain why cells with fewer bacteria,  
424mostly located in the distal (i.e. abfrontal) edge away from the ciliated zone and possibly most depleted in  
425symbiont substrates, would preferentially enter apoptosis, although this is merely hypothetical at this stage.  
426In bacteriocytes near the ciliated zone, bacteria are most probably digested [21,23,65].

427 Overall, it appears that high rates of apoptosis are a normal feature in deep-sea mussel gills  
428physiology. Rather than being a direct mechanism used to kill the most bacteria-rich cells in order to gain  
429carbon, apoptosis seems to be involved in the overall dynamics of the gill organ itself. Indeed, observed  
430patterns indicate that the cells harboring few to no bacteria are more often apoptotic. This can be interpreted  
431in the light of gill specialization to symbiosis, with over-developed gills requiring stronger cilia activity,  
432which possibly leads to higher turnover of ciliated cells, and habitat characteristics including the presence of  
433toxic compounds. Apoptosis mechanisms are known to play major roles in other symbioses [4,5,11,66]. For  
434example *Codakia orbiculata*, a shallow water bivalve that hosts Gammaproteobacteria in its gills can lose  
435and reacquire symbionts. After loss of the symbionts, the bacteriocytes multiply massively to reacquire  
436bacteria, while the cells in excess are eliminated by apoptosis [40]. A similar mechanism may be occurring in  
437mussels. At first, apoptosis could appear as a heavy cost for the host, especially given that it may endanger  
438the whole organ. However, neighboring cells could phagocytose the cells that undergo apoptosis, allowing  
439recycling of their constituents. Apoptotic cells also tend to detach from the basal lamina, and once detached

440they may be treated as food particles by the mussels, again allowing recycling. The correlation observed in  
441previous transcriptome analyses [25] between apoptotic rates and overall symbiont content may then be  
442indirect: hosts with more bacteria tend to have larger gills [8], and thus more active ciliated cells, so overall  
443more cells in apoptosis. High rates of apoptosis should thus be regarded as an integral part of the adaptation  
444of deep-sea mussels to their symbioses and their habitats, and visualization pattern indicates that apoptosis  
445probably plays more complex roles than previously assumed. This study has only investigated adult  
446specimens, but because mussels acquire their symbionts in their post-larval stage and throughout the host  
447lifetime [67,68], the coupling of symbiont acquisition with apoptosis should be explored at all developmental  
448stages. Further study should also investigate the impact of stress (toxic compounds, temperature) and those  
449of symbiont loss (when *Bathymodiolus* is moved away from the fluids compounds [18,69]) on the rates of  
450apoptosis, as well as cell proliferation patterns. Because of the relative simplicity of the mussel holobiont, its  
451high bacterial load and high levels of apoptosis, deep-sea mussels may prove useful models to further  
452investigate the links between apoptosis, autophagy and symbiosis.

453

## 454 Acknowledgments:

455 We thank the captain and crew on board the Research Vessel “*Pourquoi pas?*” and the ROV “*Victor 6000*”  
456 (Ifremer) for their invaluable contributions to this work. A special thanks to chief scientists Dr. Karine Olu  
457 (WACS 2011), Pr. François Lallier (BioBaz 2013) and Dr. Marie-Anne Cambon-Bonavita and Dr. Magali  
458 Zbinden (BICOSE 2014). We are indebted to Dr. Kamil Szafranski for his help with the deep-sea mussels *B.*  
459 *azoricus* and *B. puteoserpentis* recovered on board during the BICOSE and BioBaz cruises. We are grateful  
460 to Antoine Mangin, Myriam Lebon and Marie Louvigné for their technical assistance as undergraduate  
461 students in the lab. This research was supported by Institut Universitaire de France project ACSYMB,

462 Université Pierre et Marie Curie and ARED Région Bretagne project FlexSyBi (contract number 9127, grant  
463 to BP), BALIST program (ANR-08-BLAN-0252), EU projects EXOCET/D (FP6-GOCE-CT-2003-505342),  
464 MIDAS (FP7/2007-2013, grant agreement n° 603418) and CNRS and IFREMER for cruise funding. We are  
465 grateful to the microscopy platform Merimage (Roscoff, France) partner core facilities and to the Institute of  
466 Biology Paris-Seine Imaging Facility, supported by the “Conseil Regional Ile-de France”, CNRS and  
467 Sorbonne Université.

468

## 469 Author’s contribution:

470 B.P did the histology work, the microscopy imaging, the statistical analyses and wrote a first version of the  
471 paper. B.S. performed the isobaric mussel collections with the PERISCOP pressure-maintaining device  
472 during the two cruises (BioBaz 2013 and BICOSE 2014). F.L. enabled the collections of deep-sea mussel  
473 during the BioBaz 2013 cruise. S.D fixed the mussels during the WACS 2011 and BioBaz 2013 cruises and  
474 supervised BP’s analyses in the AMEX-team in Paris. AA fixed the *M. edulis* and contributed to BP’s  
475 histology work in the ABICE-team in Roscoff. S.D and AA are the collaborative designers of the study.  
476 S.D., A.A. and B.P. wrote the latest version of the paper, all authors have read and corrected its final draft.

477

## 478 References:

- 479[1] Kerr JFR, Wyllie AH, Currie AR. Apoptosis: a basic biological phenomenon with wide-ranging  
480 implications in tissue kinetics. Br J Cancer 1972;26:239–57.  
481[2] Häcker G. The morphology of apoptosis. Cell Tissue Res 2000;301:5–17. doi:10.1007/s004410000193.  
482[3] Elmore S. Apoptosis: a review of programmed cell death. Toxicol Pathol 2007;35:495–516.  
483 doi:10.1080/01926230701320337.

- 484[4] Vigneron A, Masson F, Vallier A, Balmand S, Rey M, Vincent-Monégat C, et al. Insects recycle  
485 endosymbionts when the benefit is over. *Curr Biol* 2014;24:2267–73. doi:10.1016/j.cub.2014.07.065.
- 486[5] Dunn SR, Schnitzler CE, Weis VM. Apoptosis and autophagy as mechanisms of dinoflagellate symbiont  
487 release during cnidarian bleaching: every which way you lose. *Proc R Soc B Biol Sci* 2007;274:3079–85.  
488 doi:10.1098/rspb.2007.0711.
- 489[6] Dunn SR, Weis VM. Apoptosis as a post-phagocytic winnowing mechanism in a coral-dinoflagellate  
490 mutualism. *Environ Microbiol* 2009;11:268–76. doi:10.1111/j.1462-2920.2008.01774.x.
- 491[7] Duperron S. The diversity of deep-sea mussels and their bacterial symbioses. In: Kiel S, editor. *Vent  
492 Seep Biota*, vol. 33, Dordrecht: Springer; 2010, p. 137–67.
- 493[8] Duperron S, Quiles A, Szafranski KM, Léger N, Shillito B. Estimating symbiont abundances and gill  
494 surface areas in specimens of the hydrothermal vent mussel *Bathymodiolus puteoserpentis*  
495 maintained in pressure vessels. *Front Mar Sci* 2016;3:1–12. doi:10.3389/fmars.2016.00016.
- 496[9] Fisher CR, Childress JJ, Oremland RS, Bidigare RR. The importance of methane and thiosulfate in the  
497 metabolism of the bacterial symbionts of two deep-sea mussels. *Mar Biol* 1987;96:59–71.
- 498[10] Sibuet M, Olu K. Biogeography, biodiversity and fluid dependence of deep-sea cold-seep communities  
499 at active and passive margins. *Deep Sea Res Part II* 1998;45:517–67. doi:10.1016/S0967-  
500 0645(97)00074-X.
- 501[11] Pflugfelder B, Cary SC, Bright M. Dynamics of cell proliferation and apoptosis reflect different life  
502 strategies in hydrothermal vent and cold seep vestimentiferan tubeworms. *Cell Tissue Res*  
503 2009;337:149–65. doi:10.1007/s00441-009-0811-0.
- 504[12] Lorion J, Kiel S, Faure B, Kawato M, Ho SYW, Marshall B, et al. Adaptive radiation of chemosymbiotic  
505 deep-sea mussels. *Proc R Soc B Biol Sci* 2013;280:20131243–20131243. doi:10.1098/rspb.2013.1243.
- 506[13] Fiala-Médioni A, Métivier C, Herry A, Le Pennec M. Ultrastructure of the gill of the hydrothermal-vent  
507 mytilid *Bathymodiolus sp.* *Mar Biol* 1986;92:65–72. doi:10.1007/BF00392747.
- 508[14] Halary S, Riou V, Gaill F, Boudier T, Duperron S. 3D FISH for the quantification of methane- and  
509 sulphur-oxidizing endosymbionts in bacteriocytes of the hydrothermal vent mussel *Bathymodiolus  
510 azoricus*. *ISME J* 2008;2:284–92. doi:10.1038/ismej.2008.3.
- 511[15] Szafranski KM, Piquet B, Shillito B, Lallier FH, Duperron S. Relative abundances of methane- and  
512 sulfur-oxidizing symbionts in gills of the deep-sea hydrothermal vent mussel *Bathymodiolus azoricus*  
513 under pressure. *Deep Sea Res Part Oceanogr Res Pap* 2015;101:7–13. doi:10.1016/j.dsr.2015.03.003.
- 514[16] Riou V, Halary S, Duperron S, Bouillon S, Elskens M, Bettencourt R, et al. Influence of CH<sub>4</sub> and H<sub>2</sub>S  
515 availability on symbiont distribution, carbon assimilation and transfer in the dual symbiotic vent  
516 mussel *Bathymodiolus azoricus*. *Biogeosciences* 2008;5:1681–91. doi:10.5194/bg-5-1681-2008.
- 517[17] Guezi H, Boutet I, Andersen AC, Lallier FH, Tanguy A. Comparative analysis of symbiont ratios and  
518 gene expression in natural populations of two *Bathymodiolus* mussel species. *Symbiosis* 2014;63:19–  
519 29. doi:10.1007/s13199-014-0284-0.
- 520[18] Kádár E, Bettencourt R, Costa V, Santos RS, Lobo-da-Cunha A, Dando P. Experimentally induced  
521 endosymbiont loss and re-acquirement in the hydrothermal vent bivalve *Bathymodiolus azoricus*. *J  
522 Exp Mar Biol Ecol* 2005;318:99–110. doi:10.1016/j.jembe.2004.12.025.
- 523[19] Riou V, Colaço A, Bouillon S, Khripounoff A, Dando P, Mangion P, et al. Mixotrophy in the deep sea: a  
524 dual endosymbiotic hydrothermal mytilid assimilates dissolved and particulate organic matter. *Mar  
525 Ecol Prog Ser* 2010;405:187–201. doi:10.3354/meps08515.
- 526[20] Barry JP, Buck KR, Kochevar RK, Nelson DC, Fujiwara Y, Goffredi SK, et al. Methane-based symbiosis in  
527 a mussel, *Bathymodiolus platifrons*, from cold seeps in Sagami Bay, Japan. *Invertebr Biol*  
528 2002;121:47–54.
- 529[21] Fiala-Medioni A, Michalski J-C, Jollès J, Alonso C, Montreuil J. Lysosomal and lysozyme activities in the  
530 gill of bivalves from deep hydrothermal vents. *Comptes Rendus Académie Sci Paris* 1994;317:239–44.
- 531[22] Streams ME, Fisher CR, Fiala-Medioni A. Methanotrophic symbiont location and fate of carbon  
532 incorporated from methane in a hydrocarbon seep mussel. *Mar Biol* 1997;129:465–476.
- 533[23] Kádár E, Davis SA, Lobo-da-Cunha A. Cytoenzymatic investigation of intracellular digestion in the  
534 symbiont-bearing hydrothermal bivalve *Bathymodiolus azoricus*. *Mar Biol* 2008;153:995–1004.  
535 doi:10.1007/s00227-007-0872-0.

- 536[24] Boutet I, Ripp R, Lecompte O, Dossat C, Corre E, Tanguy A, et al. Conjugating effects of symbionts and  
537 environmental factors on gene expression in deep-sea hydrothermal vent mussels. BMC Genomics  
538 2011;12:1–13. doi:10.1186/1471-2164-12-530.
- 539[25] Guezi H, Boutet I, Tanguy A, Lallier FH. The potential implication of apoptosis in the control of  
540 chemosynthetic symbionts in *Bathymodiolus thermophilus*. Fish Shellfish Immunol 2013;34:1709.  
541 doi:10.1016/j.fsi.2013.03.223.
- 542[26] Bettencourt R, Pinheiro M, Egas C, Gomes P, Afonso M, Shank T, et al. High-throughput sequencing  
543 and analysis of the gill tissue transcriptome from the deep-sea hydrothermal vent mussel  
544 *Bathymodiolus azoricus*. BMC Genomics 2010;11:559. doi:10.1186/1471-2164-11-559.
- 545[27] Wong YH, Sun J, He LS, Chen LG, Qiu J-W, Qian P-Y. High-throughput transcriptome sequencing of the  
546 cold seep mussel *Bathymodiolus platifrons*. Sci Rep 2015;5:16597. doi:10.1038/srep16597.
- 547[28] Zheng P, Wang M, Li C, Sun X, Wang X, Sun Y, et al. Insights into deep-sea adaptations and host-  
548 symbiont interactions: a comparative transcriptome study on *Bathymodiolus* mussels and their  
549 coastal relatives. Mol Ecol 2017;5133–48. doi:10.1111/mec.14160.
- 550[29] Sokolova IM. Apoptosis in molluscan immune defense. Invertebr Surviv J 2009;6:49–58.
- 551[30] Kiss T. Apoptosis and its functional significance in molluscs. Apoptosis 2010;15:313–21.  
552 doi:10.1007/s10495-009-0446-3.
- 553[31] Romero A, Novoa B, Figueras A. The complexity of apoptotic cell death in molluscs: An update. Fish  
554 Shellfish Immunol 2015;46:79–87. doi:10.1016/j.fsi.2015.03.038.
- 555[32] Barros I, Mendes S, Rosa D, Serrão Santos R, Bettencourt R. *Vibrio diabolicus* immunomodulatory  
556 effects on *Bathymodiolus azoricus* during long-term acclimatization at atmospheric pressure. J Aquac  
557 Res Dev 2016;7. doi:10.4172/2155-9546.1000464.
- 558[33] Cosel R von, Métivier B, Hashimoto J. Three new species of *Bathymodiolus* (Bivalvia: Mytilidae) from  
559 hydrothermal vents in the Lau Basin and the north Fiji Basin, western Pacific, and the Snake Pit area,  
560 Mid-Atlantic Ridge. The Veliger 1994;37:374–92.
- 561[34] Cosel R von, Comtet T, Krylova EM. *Bathymodiolus* (Bivalvia: Mytilidae) from hydrothermal vents on  
562 the Azores Triple Junction and the Logatchev Hydrothermal Field, Mid-Atlantic Ridge. The Veliger  
563 1999;42:218–48.
- 564[35] Olu-Le Roy K, Cosel R von, Hourdez S, Carney SL, Jollivet D. Amphi-Atlantic cold-seep *Bathymodiolus*  
565 *species* complexes across the equatorial belt. Deep Sea Res Part Oceanogr Res Pap 2007;54:1890–  
566 911. doi:10.1016/j.dsr.2007.07.004.
- 567[36] Fiala-Médioni A, McKiness Z, Dando P, Boulegue J, Mariotti A, Alayse-Danet A, et al. Ultrastructural,  
568 biochemical, and immunological characterization of two populations of the mytilid mussel  
569 *Bathymodiolus azoricus* from the Mid-Atlantic Ridge: evidence for a dual symbiosis. Mar Biol  
570 2002;141:1035–43. doi:10.1007/s00227-002-0903-9.
- 571[37] Pradillon F. High hydrostatic pressure environments. In: Bell EM, editor. Life Extrem. Environ. Org.  
572 Strateg. Surviv., Wallingford: CABI; 2012, p. 271–95. doi:10.1079/9781845938147.0271.
- 573[38] Pradillon F, Gaill F. Pressure and life: some biological strategies. Rev Environ Sci Biotechnol  
574 2007;6:181–95. doi:10.1007/s11157-006-9111-2.
- 575[39] Shillito B, Hamel G, Duchi C, Cottin D, Sarrazin J, Sarradin P-M, et al. Live capture of megafauna from  
576 2300m depth, using a newly designed Pressurized Recovery Device. Deep Sea Res Part Oceanogr Res  
577 Pap 2008;55:881–9. doi:10.1016/j.dsr.2008.03.010.
- 578[40] Elisabeth NH, Gustave SDD, Gros O. Cell proliferation and apoptosis in gill filaments of the lucinid  
579 *Codakia orbiculata* (Montagu, 1808) (Mollusca: Bivalvia) during bacterial decolonization and  
580 recolonization. Microsc Res Tech 2012;75:1136–46. doi:10.1002/jemt.22041.
- 581[41] Gavrieli Y, Sherman Y, Ben-Sasson SA. Identification of programmed cell death *in situ* via specific  
582 labeling of nuclear DNA fragmentation. J Cell Biol 1992;119:493–501.
- 583[42] Lallier F. BIOBAZ 2013 cruise, Pourquoi pas ? R/V 2013. doi:10.17600/13030030.
- 584[43] Cambon-Bonavita M-A. BICOSE cruise, Pourquoi pas ? R/V 2014. doi:10.17600/14000100.
- 585[44] Ravaux J, Hamel G, Zbinden M, Tasiemski AA, Boutet I, Léger N, et al. Thermal limit for metazoan life  
586 in question: *In vivo* heat tolerance of the pompeii worm. PLoS ONE 2013;8:e64074.  
587 doi:10.1371/journal.pone.0064074.
- 588[45] Olu K. WACS cruise, Pourquoi pas ? R/V 2011. doi:10.17600/11030010.



- 589[46] Abràmoff MD, Magalhães PJ, Ram SJ. Image processing with ImageJ. *Biophotonics Int* 2004;11:36–42.  
590 doi:<https://doi.org/10.1016/j.tcb.2004.03.002>.
- 591[47] Duperron S, Guezi H, Gaudron SM, Pop Ristova P, Wenzhöfer F, Boetius A. Relative abundances of  
592 methane- and sulphur-oxidising symbionts in the gills of a cold seep mussel and link to their potential  
593 energy sources: Variability of symbiont abundances in a seep mussel. *Geobiology* 2011;9:481–91.  
594 doi:[10.1111/j.1472-4669.2011.00300.x](https://doi.org/10.1111/j.1472-4669.2011.00300.x).
- 595[48] de Torres C, Munell F, Ferrer I, Reventos J, Macaya A. Identification of necrotic cell death by the  
596 TUNEL assay in the hypoxic-ischemic neonatal rat brain. *Neurosci Lett* 1997;230:1–4.
- 597[49] Labat-Moleur F, Guillermet C, Lorimier P, Robert C, Lantuejoul S, Brambilla E, et al. TUNEL apoptotic  
598 cell detection in tissue sections: critical evaluation and improvement. *J Histochem Cytochem*  
599 1998;46:327–34. doi:[10.1177/002215549804600306](https://doi.org/10.1177/002215549804600306).
- 600[50] Kroemer G, Galluzzi L, Vandenabeele P, Abrams J, Alnemri ES, Baehrecke EH, et al. Classification of cell  
601 death: recommendations of the Nomenclature Committee on Cell Death 2009. *Cell Death Differ*  
602 2009;16:3–11.
- 603[51] Motta CM, Frezza V, Simoniello P. Caspase 3 in molluscan tissues: Localization and possible function. *J*  
604 *Exp Zool Part Ecol Genet Physiol* 2013;319:548–59. doi:[10.1002/jez.1817](https://doi.org/10.1002/jez.1817).
- 605[52] Boatright KM, Salvesen GS. Mechanisms of caspase activation. *Curr Opin Cell Biol* 2003;15:725–31.  
606 doi:[10.1016/j.ceb.2003.10.009](https://doi.org/10.1016/j.ceb.2003.10.009).
- 607[53] Yuan J, Najafov A, Py BF. Roles of Caspases in Necrotic Cell Death. *Cell* 2016;167:1693–704.  
608 doi:[10.1016/j.cell.2016.11.047](https://doi.org/10.1016/j.cell.2016.11.047).
- 609[54] Chipuk JE, Green DR. Do inducers of apoptosis trigger caspase-independent cell death? *Nat Rev Mol*  
610 *Cell Biol* 2005;6:268–75. doi:[10.1038/nrm1573](https://doi.org/10.1038/nrm1573).
- 611[55] Abraham MC, Shaham S. Death without caspases, caspases without death. *Trends Cell Biol*  
612 2004;14:184–93. doi:[10.1016/j.tcb.2004.03.002](https://doi.org/10.1016/j.tcb.2004.03.002).
- 613[56] Childress JJ, Barnes AT, Quetin LB, Robison BH. Thermally protecting cod ends for the recovery of  
614 living deep-sea animals. *Deep Sea Res* 1978;25:419–22. doi:[10.1016/0146-6291\(78\)90568-4](https://doi.org/10.1016/0146-6291(78)90568-4).
- 615[57] Shillito B, Gaill F, Ravaux J. The IPOCAMP pressure incubator for deep-sea fauna. *J Mar Sci Technol*  
616 2014;22:97–102. doi:[10.6119/JMST-013-0718-3](https://doi.org/10.6119/JMST-013-0718-3).
- 617[58] Fiala-Medioni A. Synthèse sur les adaptations structurales liées à la nutrition des mollusques bivalves  
618 des sources hydrothermales profondes. *Oceanol Acta* 1988;N°SP:173–9.
- 619[59] Mone Y, Monnin D, Kremer N. The oxidative environment: a mediator of interspecies communication  
620 that drives symbiosis evolution. *Proc R Soc B Biol Sci* 2014;281:20133112–20133112.  
621 doi:[10.1098/rspb.2013.3112](https://doi.org/10.1098/rspb.2013.3112).
- 622[60] Circu ML, Aw TY. Reactive oxygen species, cellular redox systems, and apoptosis. *Free Radic Biol Med*  
623 2010;48:749–62. doi:[10.1016/j.freeradbiomed.2009.12.022](https://doi.org/10.1016/j.freeradbiomed.2009.12.022).
- 624[61] Sokolova IM. Cadmium-induced apoptosis in oyster hemocytes involves disturbance of cellular energy  
625 balance but no mitochondrial permeability transition. *J Exp Biol* 2004;207:3369–80.  
626 doi:[10.1242/jeb.01152](https://doi.org/10.1242/jeb.01152).
- 627[62] Company R, Serafim A, Bebianno MJ, Cosson R, Shillito B, Fiala-Médioni A. Effect of cadmium, copper  
628 and mercury on antioxidant enzyme activities and lipid peroxidation in the gills of the hydrothermal  
629 vent mussel *Bathymodiolus azoricus*. *Mar Environ Res* 2004;58:377–81.  
630 doi:[10.1016/j.marenvres.2004.03.083](https://doi.org/10.1016/j.marenvres.2004.03.083).
- 631[63] Sunila I, LaBanca J. Apoptosis in the pathogenesis of infectious diseases of the eastern oyster  
632 *Crassostrea virginica*. *Dis Aquat Organ* 2003;56:163–70. doi:[10.3354/dao056163](https://doi.org/10.3354/dao056163).
- 633[64] Goedken M, Morsey B, Sunila I, Dungan C, De Guise S. The effects of temperature and salinity on  
634 apoptosis of *Crassostrea virginica* hemocytes and perkinsus marinus. *J Shellfish Res* 2005;24:177–83.  
635 doi:[10.2983/0730-8000\(2005\)24\[177:TEOTAS\]2.0.CO;2](https://doi.org/10.2983/0730-8000(2005)24[177:TEOTAS]2.0.CO;2).
- 636[65] Détrée C, Chabenat A, Lallier FH, Satoh N, Shoguchi E, Tanguy A, et al. Multiple I-type lysozymes in the  
637 hydrothermal vent mussel *Bathymodiolus azoricus* and their role in symbiotic plasticity. *PLOS ONE*  
638 2016;11:1–19. doi:[10.1371/journal.pone.0148988](https://doi.org/10.1371/journal.pone.0148988).
- 639[66] Foster JS, McFall-Ngai MJ. Induction of apoptosis by cooperative bacteria in the morphogenesis of  
640 host epithelial tissues. *Dev Genes Evol* 1998;208:295–303.

- 641[67] Wentrup C, Wendeberg A, Huang JY, Borowski C, Dubilier N. Shift from widespread symbiont infection  
642 of host tissues to specific colonization of gills in juvenile deep-sea mussels. *ISME J* 2013;7:1244–7.
- 643[68] Wentrup C, Wendeberg A, Schimak M, Borowski C, Dubilier N. Forever competent: deep-sea bivalves  
644 are colonized by their chemosynthetic symbionts throughout their lifetime: Symbiont colonization in  
645 gills of deep-sea bivalves. *Environ Microbiol* 2014;16:3699–713. doi:10.1111/1462-2920.12597.
- 646[69] Raulfs EC, Macko SA, Van Dover CL. Tissue and symbiont condition of mussels (*Bathymodiolus*  
647 *thermophilus*) exposed to varying levels of hydrothermal activity. *J Mar Biol Assoc UK* 2004;84:229–  
648 34. doi:10.1017/S0025315404009087h.
- 649[70] Le Pennec M, Hily A. Anatomie, structure et ultrastructure de la branchie d'un Mytilidae des sites  
650 hydrothermaux du pacifique oriental. *Oceanol Acta* 1984;7:517–23.

651

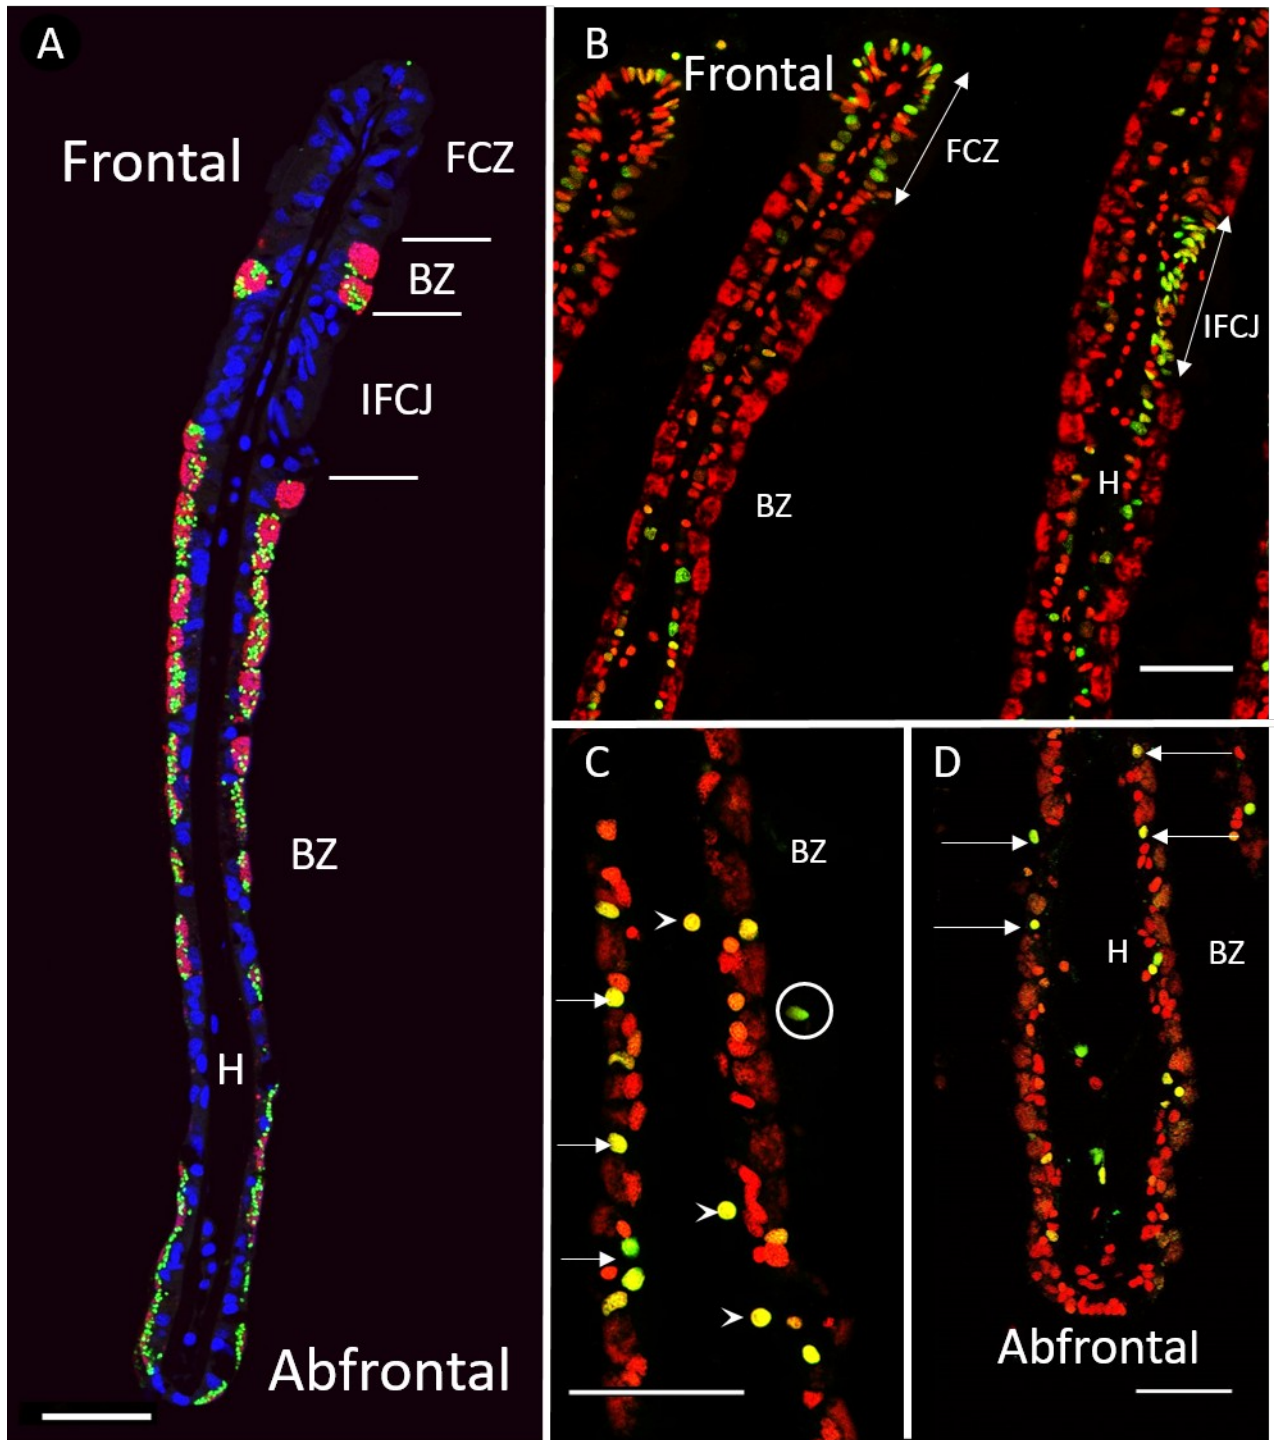

653Figure 1

654

655 Figure 2

656

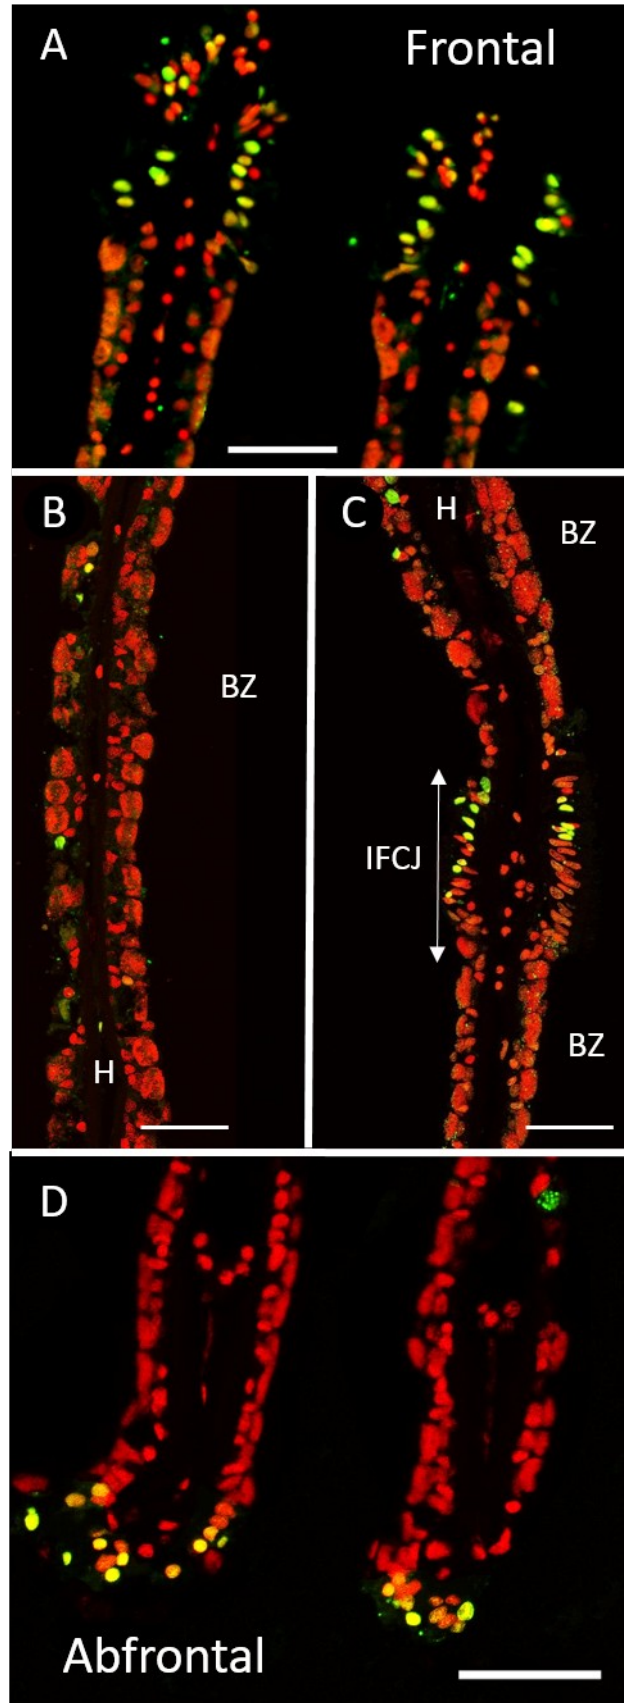

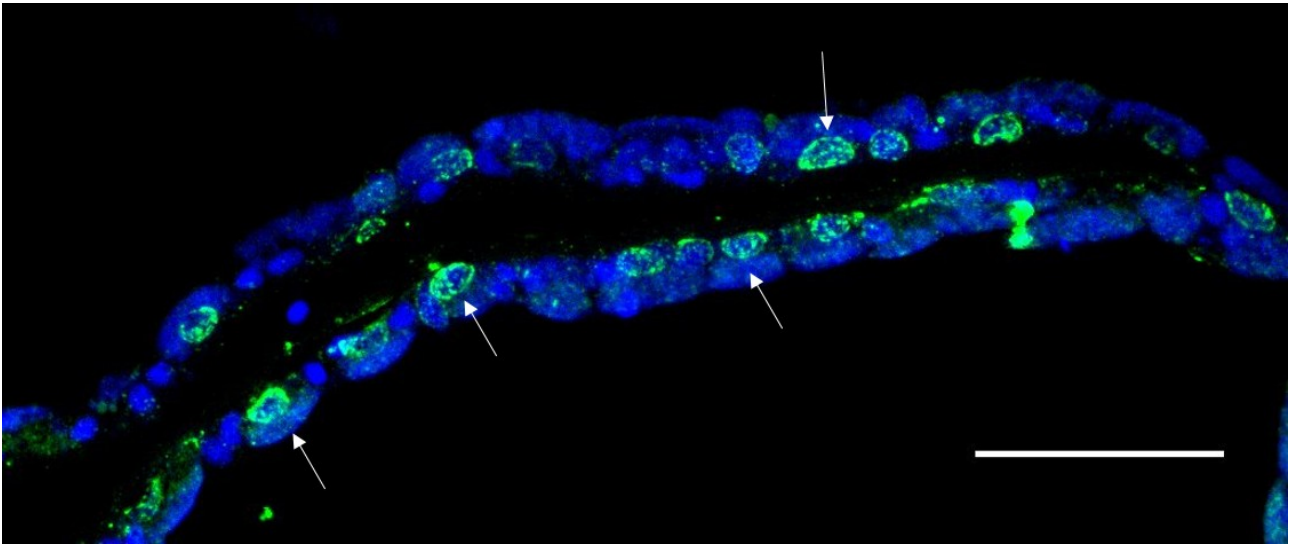

658 Figure 3

659

660

661

662

663

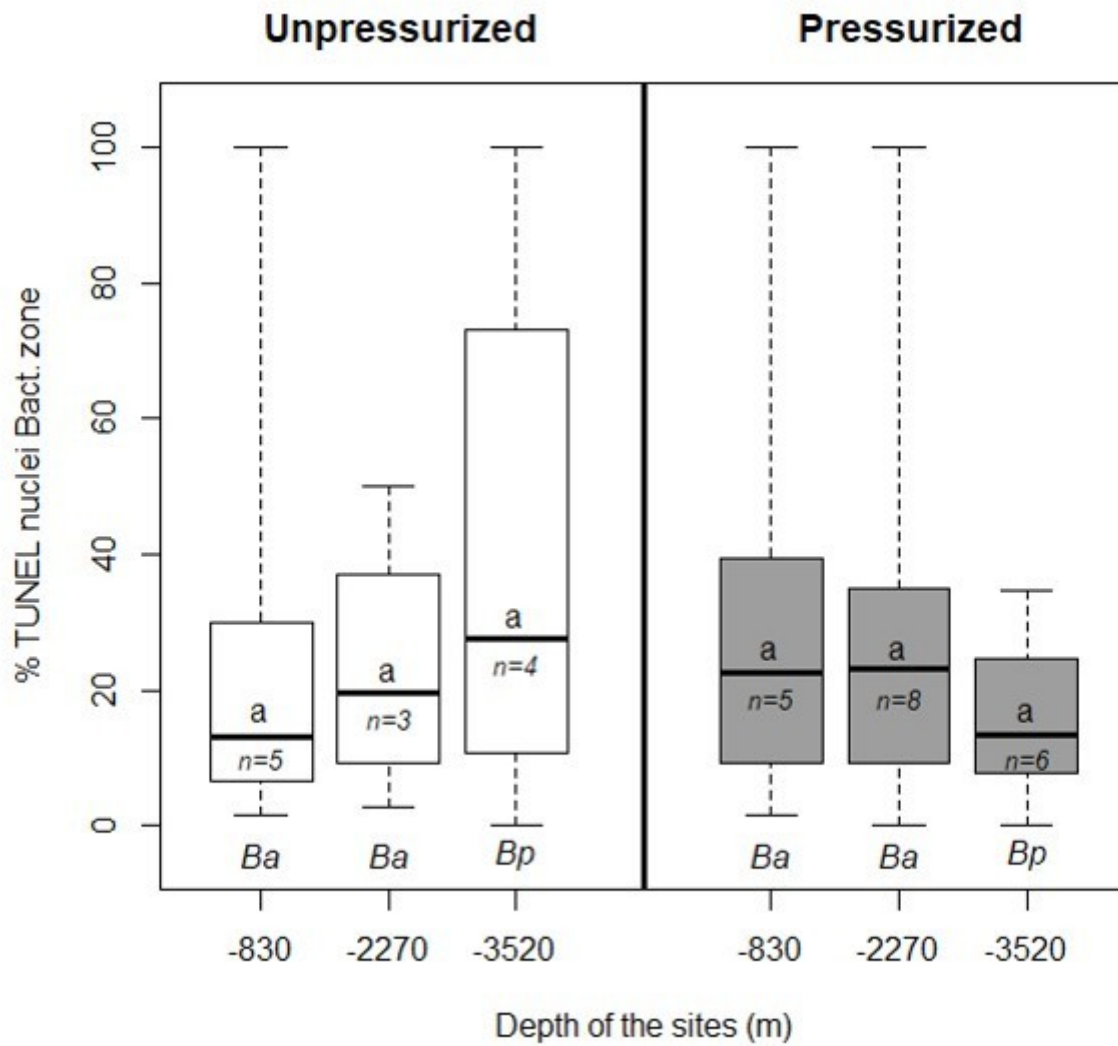

664Figure 4

665

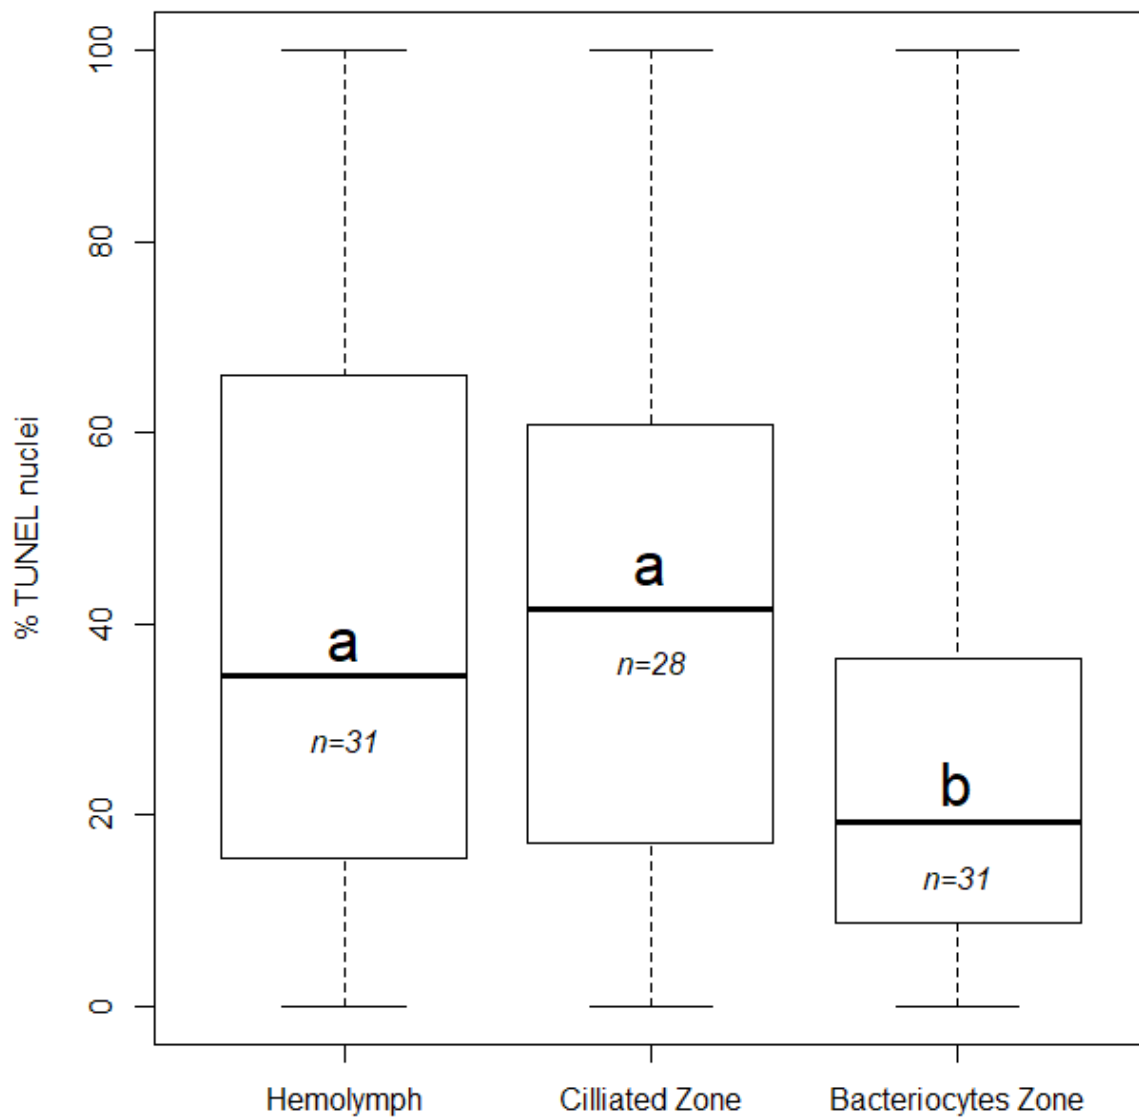

667Figure 5

668

669Figure 6

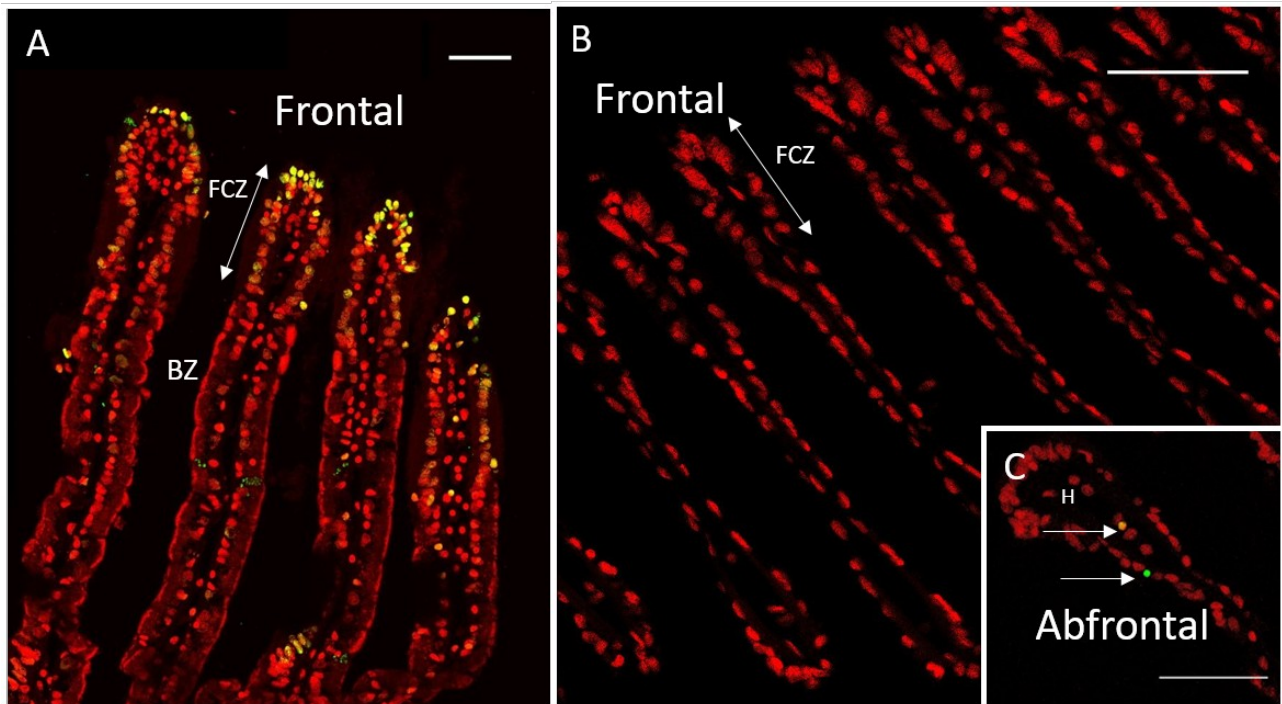



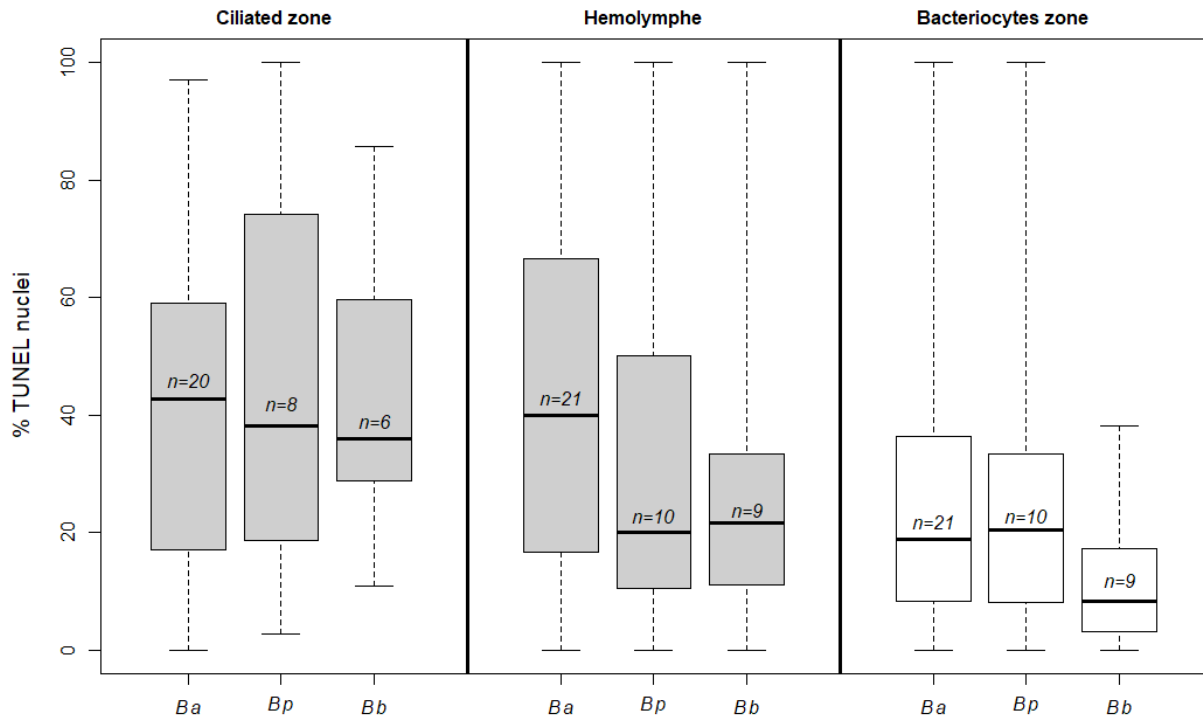

671Figure 7
